# Supplementary material
Source: PubMed Central journal article supplement (PMC6019634)

# CNON Cell Culture

Revised September 23, 2016  
(Farnham lab, University of Southern California)

Growing a single CNON cell line from the defrost step to 12x15cm plates will use 500mL of 4506 media. It is recommended that you have at least 750mL of 4506 media and 200mL of Coon's media available prior to starting this protocol. CNON should always be passaged at or before they are 80-90% confluent to ensure that cells are maintained in the exponential growth phase. Growing cells beyond this point can lead to changes in gene expression and epigenetic marks, and can potentially cause cells to differentiate or enter senescence. It is important to note that the CNON are primary human cells derived from biopsy material and have not been tested for potential pathogens; therefore, they should always be handled with caution.

## A. Day 1: Defrosting CNON cells

**Note:** It is extremely important to keep Matrigel on ice at all times and keep all cultureware/media coming in contact with Matrigel pre-chilled/ice-cold. The Matrigel will start to gel above 10°C. Warm media in 37°C water bath prior to use.

1. Prepare one 10cm plate per vial with an even, thin layer of 375 µl Matrigel (1:10) per plate.
2. Incubate plates with Matrigel at 37°C for at least 10 min.
3. Place the CNON sample vial in a 37°C water bath for no more than 5 min.
4. Once thawed, transfer the cells into a new 15mL tube.
5. Rinse CNON sample tube with 4mL of Coon's media into 15mL tube.
6. Centrifuge cells at 2000rpm (470rcf) for 7 min.
7. Discard supernatant by pipetting.
8. Resuspend cells with 10mL of 4506 media.
9. Pipet 10 mL of cells (from a single vial) into the Matrigel-coated 10cm plate prepared in steps 1 and 2.

## B. Day 2:

1. Replace media with 10mL of fresh 4506 media.
2. Cells should reach 80-90% confluence by Day 3-4 after thawing and be ready to passage from one 10cm to three 10cm plates.

## C. Day 3 or 4: Passage from one 10cm to three 10cm plates

1. Prepare three 10cm plates (per each vial of thawed cells) with an even, thin layer of 375µl Matrigel (1:10) per plate.
2. Incubate the new Matrigel-coated plates at 37°C for at least 10 min.
3. Discard media from each 10cm plate containing CNON cells (from step A9).
4. Pipet 2mL of 1x Dispase into each CNON-containing 10cm plate to cover the whole surface of the plate.
5. Incubate the Dispase-containing plates at 37°C for 30-60min.
6. After 30 min, use the microscope to check if the cells have detached. If not, let the sample sit in incubator for up to an hour.
7. Scrape cells to detach from surface using sterile cell scraper.
8. Collect all of the Dispase and cells using a pipet and put the cells from one 10 cm plate in one 15mL tube.

9. Pipet 2mL Coon's media into each scraped plate to detach and collect any remaining cells in the same 15mL tube by pipetting; combine with the original 2 mL of scraped cells. Using a microscope, make sure to check that you have harvested nearly all of the cells on the plate. If not, add more Coon's media and scrape the plate again.
10. Centrifuge the cells for 7 min at 2000rpm (470rcf).
11. Aspirate or pipette off the supernatant being careful not to disturb the pellet.
12. Add 3 mL of 4506 media to the pellet and resuspend cells.
13. Pipet 9 mL of 4506 media into each of the three Matrigel-coated 10cm plates prepared in steps 1 and 2.
14. Pipet 1 mL of resuspended cells into each of the three Matrigel-coated 10cm plates.
15. Cells should reach 80-90% confluence in 2-3 days (Day 5-7 after thawing) and then should be ready to passage from the three 10cm plates to six 15cm plates. Do not allow cells to overgrow.

**D. Day 5-7: Passage from three 10cm to six 15cm plates**

1. Prepare six 15cm plates (per defrosted vial of cells) with an even thin layer of 750  $\mu$ L Matrigel (1:10) per plate.
2. Incubate at 37°C for at least 10 min.
3. Discard media from the three 10cm plates containing CNON cells.
4. Pipet 2 mL of 1x Dispase into each 10cm plate to cover the whole surface of the plates containing CNON cells.
5. Incubate the Dispase-containing plates at 37°C for 30-60min.
6. After 30min, use the microscope to check if the cells have detached. If not, let the sample sit in incubator for up to an hour.
7. Scrape cells to detach from surface using sterile cell scraper.
8. Collect all of the Dispase and cells using a pipet and combine the cells from the 3 10 cm plates in a 50 mL tube.
9. Pipet 4mL Coon's media into each of the six scraped plates to detach and collect any remaining cells; combine with the original scraped cells in the same 50mL tube. Make sure to check that nearly all cells have detached under the microscope. If not, add more Coon's media and scrape the plate again.
10. Centrifuge the sample for 7 min at 2000rpm (470rcf).
11. Aspirate or pipette off the supernatant being careful not to disturb the pellet.
12. Pipet 12mL of 4506 media into the pellet and resuspend cells.
13. Pipet 18mL of 4506 media into each of the six Matrigel coated 15cm plates prepared in steps 1 and 2.
14. Pipet 2mL of resuspended cells into each of the six Matrigel coated 15cm plates prepared in steps 1 and 2.
15. Cells should reach 80-90% confluence in 2-3 days (Day 8-10 after thawing) and then should be ready to passage from six 15 cm plates to twelve 15 cm plates. Do not allow cells to overgrow.

**E. Day 8-10: Passage from six 15cm to twelve 15cm**

1. Prepare twelve 15cm plates with an even thin layer of 750 $\mu$ L Matrigel (1:10) per plate.
2. Incubate at 37°C for at least 10 min.
3. Discard media from each of the six 15cm plates containing CNON cells.
4. Pipet 2mL of 1xDispase into each 15 cm plate containing CNON cells to cover the whole surface of the plate.
5. Incubate the cells at 37°C for 30-60min.
6. After 30min, use the microscope to check if the cells have detached. If not, let the sample to sit in incubator for up to an hour.
7. Scrape cells to detach from surface using sterile cell scraper.
8. Collect all of the Dispase and cells using a pipet and combine the cells from all six 15 cm plates in a 50 mL tube.

9. Pipet 4mL of Coon's media into each of the six scraped plate to detach and collect any remaining cells; combine with the original scraped cells in the same 50mL tube. Make sure to check that nearly all cells have detached under the microscope. If not, add more Coon's media and scrape the plate again.
10. Centrifuge the sample for 7 min at 2000rpm (470rcf).
11. Aspirate or pipette off the supernatant being careful not to disturb the pellet.
12. Pipet 24mL of 4506 media into the pellet and resuspend cells.
13. Pipet 18mL of 4506 media into each of the twelve Matrigel coated 15cm plates prepared in steps 1 and 2.
14. Pipet 2mL of resuspended cells into each of the twelve Matrigel coated 15cm plates.
15. Cells should be ready to harvest for ChIP-seq and/or NOME-seq when they are 80-90% confluent within 3-4 days; If cells are more confluent than 80%, they should be repassaged before harvesting for gene expression of epigenomic experiments.

#### F. **Freezing cell stocks**

1. Plate one 10cm plate and allow cells to reach 80-90% confluence.
2. Discard media.
3. Pipet 1mL of 1x Dispase into the 10 cm plate to cover the whole surface of the plate.
4. Incubate the cells at 37°C for 30-60min.
5. After 30 min, use the microscope to check if the cells have detached. If not, let the sample sit in incubator for up to an hour.
6. Scrape cells to detach from surface using sterile cell scraper.
7. Collect all of the Dispase and combine the cells from both plates in one 15mL tube.
8. Pipet 2mL Coon's media into each plate to detach and collect any remaining cells; combine with the original scraped cells in the same 15mL tube. Make sure to check that nearly all cells have detached under the microscope. If not, add more Coon's media and scrape the plate again.
9. Centrifuge the sample for 7 min at 2000rpm (470rcf).
10. Aspirate or pipette off the supernatant being careful not to disturb the pellet.
11. Resuspend cells in 6mL freezing medium.
12. Transfer 1mL to each of 6 cryovials and freeze at -80°C overnight in a cryo-freezing container.
13. The next day, transfer cryovials to liquid nitrogen storage.

#### **Media Preparation:**

(Components marked with \* are working stocks)

##### **Matrigel (1:10)\***

Coon's media 4500µL

Matrigel 500µL

\*Thaw Matrigel on ice at 4°C overnight

\*Use prechilled tips and media to make dilution

\*Store at -20°C

##### **Dispase (10x)**

Dispase 0.1g

PBS fill to 10mL

\*Filter sterilize

\*Store at -20°C

\*Light sensitive

**Dispase (1x)\***

|               |     |
|---------------|-----|
| Dispase (10x) | 1mL |
| PBS           | 9mL |

\*Store at -20°C

\*Light sensitive

**Sodium selenite (100µg/mL)**

|                 |            |
|-----------------|------------|
| Sodium selenite | 1mg bottle |
| Coon's media    | add 10mL   |

\*Store at -20°C

**Sodium selenite (1:10)\***

|                            |     |
|----------------------------|-----|
| Sodium selenite (100µg/mL) | 1mL |
| Coon's media               | 9mL |

\*Store at 20°C

**Thyroxine (100µg/mL)**

|              |            |
|--------------|------------|
| Thyroxine    | 1mg bottle |
| Coon's media | add 10mL   |

\*Store at -20°C

**Thyroxine (1:10)**

|                      |     |
|----------------------|-----|
| Thyroxine (100µg/mL) | 1mL |
| Coon's media         | 9mL |

\*Store at -20°C

**Thyroxine (1:100)\***

|                  |     |
|------------------|-----|
| Thyroxine (1:10) | 1mL |
| Coon's media     | 9mL |

\*Store at -20°C

**Transferrin (50mg/mL)**

|              |              |
|--------------|--------------|
| Transferrin  | 100mg bottle |
| Coon's media | add 2mL      |

\*Store at -20°C

**Transferrin (10mg/mL)\***

|                       |      |
|-----------------------|------|
| Transferrin (50mg/mL) | 1 mL |
| Coon's media          | 4mL  |

\*Store at -20°C

**Coon's media (1L)**

|                            |                    |
|----------------------------|--------------------|
| Millipore H <sub>2</sub> O | 800mL              |
| Sodium bicarbonate         | 2.68g              |
| Ham's F-12                 | 11.5g (one bottle) |

- Use stir bar to mix
- Adjust to pH 7.2 with HCl
- Fill to 1L
- Filter sterilize using 0.22µM low protein binding membrane

**4506 Media (500 mL)**

|                                       | <b><u>Volume</u></b> | <b><u>Final Conc.</u></b> |
|---------------------------------------|----------------------|---------------------------|
| Coon's Media                          | 455mL                | --                        |
| Fetal bovine serum                    | 30mL                 | 6%                        |
| Transferrin (Human) (10mg/mL)         | 250 $\mu$ L          | 5 $\mu$ g/mL              |
| Insulin (10mg/mL)                     | 50 $\mu$ L           | 1 $\mu$ g/mL              |
| Hydrocortisone (50 $\mu$ M)           | 100 $\mu$ L          | 10nM                      |
| Sodium selenite (1:10)                | 125 $\mu$ L          | 2.5ng/mL                  |
| Thyroxine (1:100)                     | 20 $\mu$ L           | 40pg/mL                   |
| Antibiotic-Antimycotic (100x)         | 5mL                  | 1%                        |
| Bovine pituitary extract (13mg/mL)    | 400 $\mu$ L          | 50 $\mu$ g/mL             |
| Endothelial Cell Growth (15mg/bottle) | 5 bottle             | 150 $\mu$ g/mL            |

- Note: dissolve ECG powder in each bottle in 2mL of Coon's media
- Combine all the reagents for 4506 in a beaker
- Filter the media using 0.22 $\mu$ m low protein binding membrane
- Store at 4°C

**Freezing media (100mL)**

|            | <b><u>Volume</u></b> | <b><u>Final Conc.</u></b> |
|------------|----------------------|---------------------------|
| 4506 Media | 75mL                 | 75%                       |
| FBS        | 20mL                 | 20%                       |
| DMSO       | 5mL                  | 5%                        |

- Combine all the reagents for freezing media in a beaker
- Filter the media using 0.22 $\mu$ m low protein binding membrane
- Store at -20°C

**Reagents Used:**

| <b>Reagent</b>                                               | <b>Vendor</b>   | <b>Catalog number</b> |
|--------------------------------------------------------------|-----------------|-----------------------|
| 100X Antibiotic-Antimycotic (100 mL)                         | Life Technology | 15240062              |
| Fetal Bovine Serum, Qualified, USDA Approved Regions, 500 mL | Life Technology | 26140079              |
| Nutrient Mixture F-12 HAM                                    | Sigma Aldrich   | F6636-10X1L           |
| Transferrin (Human)                                          | Sigma Aldrich   | T8158-100MG           |
| Hydrocortisone solution (50 UM)                              | Sigma Aldrich   | H6909-10ML            |
| Sodium selenite G-Irradiated, BIOXTRA                        | Sigma Aldrich   | S9133-1MG             |
| L-Thyroxine sodium salt pentahydrate (gamma-irradiated)      | Sigma Aldrich   | T0397-1MG             |
| Insulin Human, Recombinant                                   | Sigma Aldrich   | I2643-25MG            |
| Pituitary extract, Bovine                                    | Sigma Aldrich   | P1476-25ML            |
| Endothelial cell growth, 10 bottles                          | Millipore       | 02-102                |
| Matrigel (10mL)                                              | Corning         | 354234                |
| Dispase                                                      | Gibco           | 17105-041             |

# Farnham Lab CHIP & Library Construction Protocol for CNON cells

(October 4, 2016 version)

We are using CNON cells for this project (see CNON cell growth protocol). Before beginning the experiment, record all cell information (e.g patient number, passage number, unusual growth conditions, etc) for future reference. Note that cells should be cross-linked at 80% confluence with ~10% of the cell population in mitosis, which indicates a healthy cell population. **Overgrowth of cells will result in failed ChIPs.** We are growing twelve 15cm plates per sample for this project to perform several histone ChIPs and NOME-seq on the same cell population. We anticipate that roughly 100 ug of chromatin can be obtained from the twelve plates. We require 10µg of chromatin for each histone ChIP; also keep in mind that up to 5µg of chromatin will be needed every time you check the fragment size after sonication. **Use filtered tips throughout protocol to avoid DNA contamination in sequencing results.**

## A. Crosslinking Cells: Day 0/1

1. In a chemical hood, add 540µL formaldehyde (from the 37% stock bottle) directly to the culture media (20 mLs) of each 15cm plate to a final concentration of 1%. Place the adherent CNON cells on a shaking platform in the chemical hood for no more than 10 minutes at room temperature. **Do not cross-link for longer periods since this WILL cause cells to form aggregates that do not sonicate efficiently.** Note: Media containing formaldehyde should be treated as hazardous waste until glycine inactivates formaldehyde in next step.
2. Stop crosslinking reaction by adding glycine to a final concentration of 0.125M. We use 2.2mL of a 10X (1.25M) stock solution per 15cm plate. Continue to agitate ≥5 min @ RT.
3. Pour off media and rinse plates twice with ice-cold 1XPBS. Use a cell scraper to scrape cells into a 50mL tube on ice, using the residual PBS on plates. Use a few extra mLs of PBS containing protease inhibitors to collect all cells from the plate.
4. Centrifuge the 50mL tube of crosslinked cells at 430 rcf for 5 min at 4°C. Leave ~1mL of supernatant to transfer cell pellet to a labeled 1.5mL tube. Note: It is important to carefully aspirate supernatant so as to not lose cells.
5. Centrifuge the 1.5mL tube crosslinked cells at 430 rcf for 5 min at 4°C. Carefully remove all supernatant using a pipette or aspirator. Do not pour off supernatant. Note: It is important not to leave any remaining supernatant as doing so can result in cell lysis and loss of chromatin.
6. Snap freeze cell pellet in liquid nitrogen and store at -80°C.
7. Cells may now be used immediately (preferred method) for a chromatin preparation or snap frozen in liquid nitrogen and stored at -80°C. Freezing cells at this stage can result in a loss of chromatin, as some nuclei will inevitably rupture. Additionally, any excess PBS not removed in previous step will rupture more cells resulting in additional loss of material.

## B. Chromatin Sonication: Day 1

1. Prepare in advance CLB\* (Cell Lysis Buffer plus additional required reagents). First, add Igepal (10µL NP40 per mL of stock CLB) to water, agitate at 37°C to dissolve, and then cool on ice. Then add PIPES and KCl and protease inhibitors (see recipes for details on protease inhibitors).
2. Resuspend cross-linked cells on ice by pipetting a few times with 500µL of ice-cold CLB\*. Then, transfer cells to a 15mL tube and add 20x the volume of the cross-linked cell pellet with cold CLB\* by washing the 50ml tube several times with 500µl of ice-cold CLB\* and adding to the 15 ml tube.
3. Incubate on ice for 15 minutes to allow cells to swell and lyse. If using frozen cross-linked cells, thaw them on ice; keep all cells and chromatin samples on ice at all times.
4. Homogenize cells using the appropriate size (2mL or 7mL) glass dounce homogenizer (type B) to break open the cells and release nuclei. Homogenize cells on ice with 20 strokes. Place sample back into previous tube.
5. Centrifuge the cross-linked cells at 430 rcf for 5 min at 4°C. Discard the supernatant. Use ~500µL of CLB\* to transfer sample into a new 1.5mL and repeat spin down. Discard supernatant. You may snap-freeze the nuclear pellet and store at -80°C for later use. **This is the preferred stopping point for sample prep.**
6. Resuspend pellet in nuclei lysis buffer plus protease inhibitors with 5X the volume of the pellet present. Nuclei concentrations that are too high can lead to inefficient sonication and nuclei that are too dilute will result in higher amounts of SDS which will then require much larger volumes of IP dilution buffer (making sample handling more labor intensive).
7. Incubate on ice for 30 minutes. You may snap-freeze the nuclei in nuclei lysis buffer to aid in the lysis of

cells before continuing with sonication.

8. Sonicate cells in cold environment to achieve an average chromatin length of 200-1000bp. Sonication conditions should be optimized for each cell type. For CNON cells, we commonly sonicate 10 minutes (~10 pulses of 30 seconds at the high setting on a Bioruptor Pico using appropriate weight of sonication beads, 30 second pause in between pulses). Volumes between 0.5mL and 2mL are sonicated in 15mL polystyrene tubes and volumes between 0.1 and 0.3mL are sonicated in specialized 1.5mL polystyrene tubes.
9. Transfer sonicated material into 1.5mL tubes (use multiple 1.5mL tubes if volume is more than 1.4mL) and centrifuge at maximum speed for 10 minutes at 4°C. (If samples were sonicated in polystyrene tubes, be sure to transfer to polypropylene tubes for the hard spin, otherwise the tubes will likely crack.) Carefully transfer the supernatant (sonicated chromatin) to a new tube while avoiding cell debris. Keep sonicated material (chromatin and cell debris) at 4°C while performing quantification and determining chromatin size. You may need to recombine the cell debris pellet and supernatant (containing the chromatin) to continue further sonication of all the material.

### C. Determining Chromatin Size & Quantification: Day 1

1. Transfer 40µl of sonicated chromatin to a 500µL tube.
2. Add 60µL ChIP elution buffer and 12µL of 5M NaCl.
3. Boil samples in water bath for 15 minutes to reverse cross-links.
4. Allow sample to cool down, add 1µL DNase-free RNase (Thermo Scientific cat# EN0531), and incubate 10 minutes at 37°C. This step is important because the presence of RNA results in false estimation of chromatin size.
5. Purify DNA using a PCR purification kit (Qiagen cat# 28106), elute in 30µL EB. Measure DNA concentration by NanoDrop and calculate the chromatin yield. Cells typically yield ~2µg of material per  $5 \times 10^5$  cells.
6. Run 1.5-2µg of DNA on a 1.5% agarose gel to visualize average size of chromatin. **MAKE SURE TO USE 10X ORANGE G LOADING DYE** as using a different loading dye leads to a bleaching out in the lane where the dyes are present and makes it impossible to determine sonication efficiency. If the chromatin is larger than ~1000bp, resuspend the cell debris pellet with the chromatin and repeat steps 1-5 until desired range of 200 to 1000bp is obtained. If samples are taking much longer than 20 minutes of sonication to achieve desired size, do not proceed. This is an indication that over-crosslinking has occurred and your cross-linking protocol may need to be modified to decrease the amount of cross-linking. Alternatively, the instrument being used for sonication may have lost motor power, which does happen with normal wear and tear on sonication instruments.

### D. Chromatin Immunoprecipitation: Day 1

1. Use 10-20µg of chromatin for each Histone ChIP (20µg of chromatin may be preferable for Histone ChIPs that are more difficult, such as broad marks).
2. Remove 500ng of chromatin for the **Input** sample and bring to a total volume of 150µl with ChIP elution buffer. Store this amount at -20°C until the next day and then reverse the cross-links in the Input chromatin at the same time the crosslinks in the ChIP samples are reversed.
3. Dilute chromatin with at least 5-fold ice-cold IP dilution buffer containing protease inhibitors. This ensures that the SDS concentration is not too high for antibody binding.
4. Add antibody specific to the Histone Mark of interest to capture the protein/chromatin complexes. **Record amount of chromatin and antibody, the catalogue number and lot number of antibodies for future reference!**
5. Incubate on a rotating platform at 4°C overnight.

| Chromatin Amount | Antibody name | Antibody Provider         | Antibody Cat# | Antibody Amount |
|------------------|---------------|---------------------------|---------------|-----------------|
| 10µg             | H3K4me3       | Cell Signaling Technology | 9751S         | 10µL            |
| 10µg             | H3K27ac       | Active Motif              | 39133         | 4µg             |
| 10µg             | H3K27me3      | Cell Signaling Technology | 9733          | 10µL            |
| 20µg             | CTCF          | Active Motif              | 61311         | 5µL             |



|      |      |                           |       |      |
|------|------|---------------------------|-------|------|
| 20µg | CTCF | Cell Signaling Technology | 3418S | 10µL |
|------|------|---------------------------|-------|------|

### E. Capture Antibody/Chromatin Complex and Reverse Crosslinks: Day 2

-----All the following steps are carried out at room temperature-----

1. Wash beads in 1mL IP wash buffer 1 (IPWB1) twice and resuspend with starting volume of beads.
2. Add 15µL magnetic protein A/G beads per Histone ChIP sample and incubate on a rotating platform for 2 hrs at 4°C. We use magnetic protein A/G bead mix from Pierce Protein A/G (#88803). **These magnetic beads are DIFFERENT THAN PCR CLEAN UP AMPURE BEADS!**
3. Allow beads to settle for 1 min in a magnetic separation rack, then carefully remove the supernatant.
4. Wash magnetic beads two times with IP wash buffer 1 (RIPA buffer without protease inhibitors); take tubes out of magnetic rack and mix by inverting the tube. Efficient washing is critical to reduce background. Avoid cross-contamination of samples and loss of magnetic beads.
5. Wash magnetic beads three times with IP wash buffer 2 (IPWB2), take tubes out of magnetic rack and mix by inverting the tube. **\*Transfer to a new tube for your final wash. This will help eliminate background since a lot of DNA ends up sticking to the walls of the tube and the elution step will release this “sticky” DNA into your sample. Switch to a new tube on your last wash. Remove all wash solution after final wash by spinning down and using 10µL pipette.**
6. Elute antibody/chromatin complexes by adding 75µL IP elution buffer. Shake on vortexer for 30 minutes, setting 2.
7. Allow beads to settle for 1 min in a magnetic separation rack. Carefully transfer supernatant containing antibody/chromatin complexes to a new tube.
8. Repeat steps 6 and 7, but combine the second 75µL elution with the first to obtain a total of 150µL of material.
9. At this point, thaw the Input sample(s) from the previous day. Add 20µL of 5M NaCl per 150µL elution buffer (to give approx. 0.6M final concentration) for each ChIP and Input.
10. Incubate all samples at 67°C overnight to reverse formaldehyde crosslinks.

### F. DNA Purification: Day 3

1. Purify DNA with a Qiagen MinElute PCR clean up kit, one column per sample. Elute each sample with 50µL EB.

# ChIP Buffers List

Protease inhibitor stock solutions (stored at -20°C) Note: Protease inhibitors are added to ice-cold solutions at time of use only. Do not add protease inhibitors to IP wash and elution buffers. A mixture of protease inhibitors (1) or a protease inhibitor cocktail may be used as described below.

- 1) Aprotinin (10mg/mL), Leupeptin in water (10mg/mL), 100 mM PMSF in isopropanol, 1M DTT in PBS.  
[Volume PI per Buffer/Solution Volume = Aprotinin (1µL/mL, \*we use 13µL/mL of our VWR Aprotinin soln (cat# 80603-220) that is stored at 4°C\*), Leupeptin (1µL/mL), PMSF (10µL/mL), DTT (1µL/mL)]
- 2) 200X Protease Inhibitor Cocktail, VWR catalogue #80053-852

## Cell Lysis Buffer

5mM PIPES pH 8.0  
85mM KCl  
1% Igepal/NP40 (10µL/mL), agitate at 37°C to dissolve  
Add protease inhibitors when cold

## Nuclei Lysis Buffer

50mM Tris-Cl pH 8.1  
10mM EDTA  
1% SDS  
Add protease inhibitors when cold  
\*SDS will fall out of solution when cold, this does not affect solution as long as adequate mixing occurs before use\*

## IP Wash Buffer 1

50mM Tris pH 7.4  
150mM NaCl  
1% (10µL/mL) NP40  
0.25% Deoxycholic acid  
\*some brands of Deoxycholic acid do not dissolve in solution, we use Fisher Scientific cat# BP349\*  
1mM EDTA pH 8.0

## IP Dilution Buffer (RIPA)

50mM Tris pH 7.4  
150mM NaCl  
1% Igepal/NP40 (10µL/mL)  
0.25% Deoxycholic acid  
\*some brands of Deoxycholic acid do not dissolve in solution, we use Fisher Scientific cat# BP349\*  
1mM EDTA pH 8.0  
Add protease inhibitors when cold

## IP Wash Buffer 2

100mM Tris-Cl pH 9.0  
500mM LiCl  
1% Igepal/NP40  
1% Deoxycholic acid  
\*some brands of Deoxycholic acid do not dissolve in solution, we use Fisher Scientific cat# BP349\*

## ChIP Elution Buffer

50mM NaHCO<sub>3</sub>  
1% SDS

# Library Construction Protocol

This protocol describes the preparation of libraries using the **KAPA Hyper Prep Kit from KAPA Biosystems (#KK8505)**. Libraries are prepared from the ChIP sample, as well as from Input DNA from the corresponding cell type. It is not necessary to make a fresh Input library every time. You may save library reagents and use an Input library from the same cell type prepared previously for checking enrichment levels by qPCR in the last step. All clean up steps are with PCR Clean Up Ampure magnetic beads (Agencourt Ampure, Beckman Coulter, cat# A29152), **not to be confused with the magnetic protein A/G beads used in the previous ChIP portion of the protocol.**

## Step 1: End-Repair and A-Tailing

This step ensures that all DNA fragments are converted to blunt-ended, 5'-phosphorylated DNA.

- A) Combine and mix the following components in a PCR tube:
  - 50µL ChIP DNA (entire ChIP sample) -or- 100ng Input DNA (10µL) and 40µL EB
  - 7µL End Repair and A-Tailing Buffer
  - 3µL End Repair and A-Tailing Enzyme Mix
  - 60µL Total Volume
- B) Mix thoroughly and centrifuge briefly.
- C) Incubate in a thermocycler with the following profile:
  - 20°C → 30 min
  - 65°C → 30 min
  - 10°C → ∞
- D) **Proceed immediately to the next step.**

## Step 2: Illumina Barcode Adapter Ligation (BIOO Adapters)

BIOO supplies their NEXTflex™ DNA Barcodes adapters at 25µM, so make a 1:17 dilution (final concentration 1.5µM).

- A) Combine and mix the following components in PCR tube:
  - 60µL End Repair and A-Tailing Reaction Product
  - 9µL EB
  - 30µL Ligation Buffer
  - 1µL BIOO Adapter (1.5µM)
  - 10µL DNA Ligase
  - 110µL Total Volume
- B) Mix thoroughly and centrifuge briefly
- C) Incubate at 20°C for 15 min
- D) **Proceed immediately to the next step.**

## Step 3: Post-Ligation Clean Up

- A) Perform a low ratio (0.8x) bead clean up by combining the following:
  - 110µL Adapter Ligation Reaction Product
  - 88µL Ampure Magnetic Beads
  - 198µL Total Volume
- B) Thoroughly mix beads and incubate 5-15 min to bind DNA to beads.
- C) Place tube on a magnet to capture beads until solution looks clear. Beads may take several minutes to pellet.
- D) Carefully remove and discard supernatant. **Do not allow the beads to dry.**
- E) Wash 2x with 200µL 80% freshly made ethanol. During all washes, keep beads stationary on the magnet (do not pipette up and down) and visually ensure that the beads aren't slipping.
- F) Do a final spin and hold tube against the magnet while pipetting off last remaining ethanol wash.
- G) Resuspend beads with 30µL of EB and incubate for 2 min at room temperature to elute DNA off the beads.

- H) Place tube on magnet and transfer clear solution to a new tube.
  - I) Perform a second low ratio (0.8x) bead clean up with 24µL Ampure magnetic beads.
  - J) Thoroughly mix beads and incubate 5-15 min to bind DNA to beads.
  - K) Place tube on a magnet to capture beads until solution looks clear. Beads may take several minutes to pellet.
  - L) Carefully remove and discard supernatant. **Do not allow the beads to dry.**
  - M) Wash 2x with 200µL 80% freshly made ethanol. During all washes, keep beads stationary on the magnet (do not pipette up and down) and visually ensure that the beads aren't slipping.
  - N) Do a final spin and hold tube against the magnet while pipetting off last remaining ethanol wash.
  - O) Resuspend beads with 20µL of EB and incubate for 2 min at room temperature to elute DNA off the beads.
  - P) Place tube on magnet and transfer clear solution to a new tube.
- \*ONLY HALF OF LIGATED MATERIAL WILL BE USED IN NEXT STEP\***

#### Step 4: Amplification of Adapter-Modified DNA Fragments

For B100 adapters, make sure to use the supplied B100 primer mix with a 12.5µM conc. Dilute the mix 1:2 (final concentration 6.25µM) and use 1µL per 50µL PCR reaction (as outlined in step A below).

Use only half of the adapter-ligated material and proceed with 12 cycles of PCR for all ChIP-seq library samples and 10 cycles of PCR for all Input library samples. Depending on how 12 or 10 cycles of amplification works out, you have the option of using the other half of adapter ligated material if the sample is too overamplified. If 12 or 10 cycles is too low, simply take the same material and redo amplification with fresh reagents with an appropriate number of additional cycles.

- A) Combine and mix the following components in PCR tubes:
  - 10µL Adapter Ligated Reaction Product
  - 14µL EB
  - 25µL KAPA HiFi HotStart Ready Mix
  - 1µL B100 PCR primer mix (6.25µM)
  - 50µL Total Volume

- B) Amplify using the following PCR protocol:
  - 98°C → 45 sec
  - 10-15 cycles:
    - 98°C → 15 sec
    - 60°C → 30 sec
    - 72°C → 30 sec
  - 72°C → 1 min
  - 10°C → ∞

Over-amplification should be avoided to reduce potential PCR artifacts.

#### Step 5: Library Purification, Quality and Quantification

- A) Purify with 40µL Ampure magnetic beads (0.8x ratio volume).
- B) Elute in 20µL EB.
- C) Place tubes back in magnetic stands to collect the DNA and transfer liquid to new tubes.
- D) Check concentration with High Sensitivity DNA Qubit.
- E) Check quality by BioAnalyzer. If excessive amount of primer dimer (85bp) and/or adapters (120bp) are present, redo the Ampure bead clean up with a 0.8x volume ratio which allows for capturing larger size fragments and loss of smaller fragments, such as the primer and/or adapter dimers.

## Step 6: Library Confirmation

Check enrichment using positive and negative target primers (**see Table below**). Enrichment of marks in the ChIP-seq libraries are determined by quantitative real-time PCR (qPCR). The ChIP-seq Library and Input Library are diluted with EB to give a final concentration of no more than 1 ng/μL and serves as a reference. Prepare a master reaction mix for each library with triplicate reactions per primer set. Add extra reagents to provide at least 5% more than the total number of reagents needed to account for loss of volume. Add 18μL of reaction mix to each PCR reaction well. Add 1μL primer mix to each well.

Recipe for one reaction:

|      |                                                                      |
|------|----------------------------------------------------------------------|
| 1μL  | ChIP-seq Library or Input Library (1ng/μl)                           |
| 1μL  | 10μM Target Primer Mix (containing both Forward and Reverse Primers) |
| 8μL  | Nuclease-free H2O                                                    |
| 10μL | <u>SsoFast Evagreen Supermix</u>                                     |
| 20μL | Total Volume                                                         |

Amplify with the following PCR protocol:

95°C → 3 min

40 cycles:

95°C → 5 sec

60°C → 5 sec

Include a 65-95°C melting curve at the end of the qPCR program, reading every ≤0.5°C.

Analyze the qPCR results by first manually determining the cycle threshold for each reaction across the plate within the linear range of the amplification curve. Calculate the average cycle threshold for each triplicate reaction of each sample. The relative DNA amount is then calculated for any given primer set as 2 to the power of the cycle threshold (cT) difference between input chromatin and ChIP samples, where cT is the average value.

$$\text{Ratio of sample DNA to Input DNA concentration} = 2^{(cT_{\text{INPUT}} - cT_{\text{SAMPLE}})}$$

The values are then normalized with one of the negative controls. This is accomplished by dividing the relative DNA amount of each sample for a target primer set by the corresponding value for a negative control primer set. The resulting quotient represents the fold enrichment. Repeat normalization with the second negative control. **Do not proceed with sequencing unless the positive targets are at least 10-fold enriched over Input (with a possible exception for broad marks). See graphs below for examples of libraries that have produced good ChIP-seq data.**

| Primer Name | Primer Sequence          | hg19 Location           | Size  | Target           |
|-------------|--------------------------|-------------------------|-------|------------------|
| ACTB-F      | AGGGTGAGGATGCCTCTCTT     | chr7:5568955-5569056    | 102bp | H3K4me3 Positive |
| ACTB-R      | GGGCTTCTTGTCTTTTCCTT     |                         |       |                  |
| GAPDH-K4_F  | AAGCCTGCCGGTGACTAAC      | chr12:6644505-6644614   | 110bp | H3K4me3 Positive |
| GAPDH-K4_R  | CATCACCCGGAGGAGAAAT      |                         |       |                  |
| POLR2A-F    | GAGGTGAACACGACAGACCA     | chr17:7388594-7388741   | 148bp | H3K4me3 Positive |
| POLR2A-R    | CTCCATGGGATTACCCCTTT     |                         |       |                  |
| RPL30_F     | AACTGCCCAGCTTTGAGGTAATCG | chr8:99057027-99057187  | 161bp | H3K4me3 Positive |
| RPL30_R     | ATGAAGGGCCAAACACCACAATCG |                         |       |                  |
| VIM-F       | CTCCTCTGTCCCCACACATT     | chr10:17272185-17272300 | 116bp | H3K4me3 Positive |
| VIM-R       | TTGGAGGACTGGCTCTCATT     |                         |       |                  |
| CDH1_SF-F   | GTGAACCCTCAGCCAATCAG     | chr16:68771118-68771224 | 107bp | H3K4me3 Negative |
| CDH1_SF-R   | TCACAGGTGCTTTGCAGTTC     |                         |       |                  |
| ZNF180_3'-F | TGATGCACAATAAGTCGAGCA    | chr19:44980743-44980879 | 137bp | H3K4me3 Negative |
| ZNF180_3'-R | TGCAGTCAATGTGGGAAGTC     |                         |       |                  |
| ZNF554_3' F | CGGGGAAAAGCCCTATAAAT     | chr19:2834442-2834559   | 118bp | H3K4me3 Negative |
| ZNF554_3' R | TCCACATTCACTGCATTCGT     |                         |       |                  |

## Example of H3K4me3 library enrichments

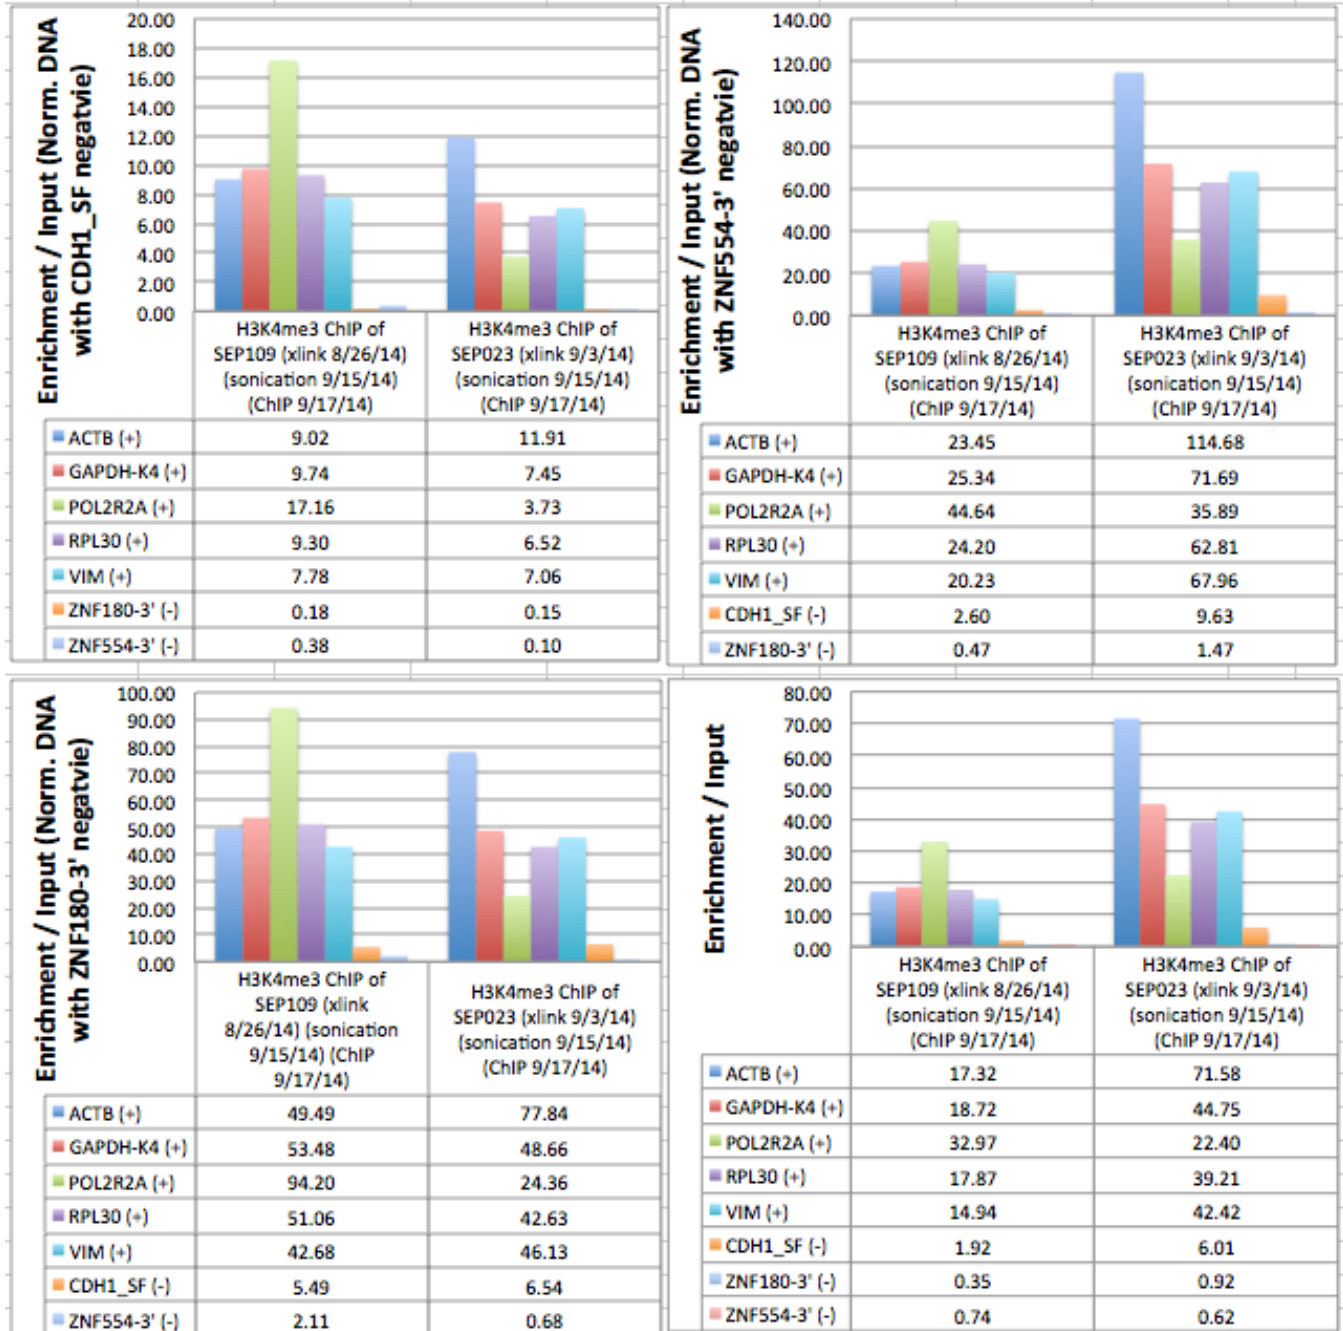

Supplement: NIHMS974812-supplement-Supplemental_Information.pdf [file NIHMS974812-supplement-Supplemental_Information.pdf]
